# Supplementary material for: Effects of the Glycosylation of the HA Protein of H9N2 Subtype Avian Influenza Virus on the Pathogenicity in Mice and Antigenicity
Source: Hindawi journal article supplement (doi:10.1155/2024/6641285), 2024-01-01
Supplement: f1 [file 6641285.f1.pdf]

Table S1 Detailed information about the proportion of glycosylation modification of different GMS globally.

|                                                                 | HA1    |       |        |               |         |                        |               |               |         |         |         |               |               |                       |         |
|-----------------------------------------------------------------|--------|-------|--------|---------------|---------|------------------------|---------------|---------------|---------|---------|---------|---------------|---------------|-----------------------|---------|
| Glycosylation forms                                             | NSTE   | NCTI  | NGTC   | NVSY/<br>NVTY | NGTS    | NNTY/<br>NNSY/<br>NGSY | NTTQ/<br>NDTQ | NDTT/<br>NDTS | NRTF    | NGSL    | NGSC    | NCTV/<br>NSSG | NTTL/<br>NSTL | NVSK/<br>NISK/<br>VSR | NCSK    |
| Glycosylated sites                                              | 11-13  | 54-56 | 87-89  | 123-125       | 127-129 | 148-150                | 178-180       | 188-190       | 200-202 | 238-240 | 265-267 | 267-269       | 280-282       | 287-289               | 295-297 |
| Number of glycosylated modification                             | 7691   | 5     | 1097   | 7865          | 269     | 48                     | 19            | 109           | 1968    | 2       | 2       | 23            | 7588          | 7819                  | 5821    |
| The proportion of glycosylation modification(total number:7888) | 97.50% | 0.06% | 13.91% | 99.71%        | 3.41%   | 0.61%                  | 0.24%         | 1.38%         | 24.95%  | 0.03%   | 0.03%   | 0.29%         | 96.20%        | 99.13%                | 73.80%  |

Table S2 Detailed information about the proportion of glycosylation modification of different GMS in domestic.

|                                                                 | HA1    |       |       |               |         |         |         |         |         |         |         |         |         |               |         |
|-----------------------------------------------------------------|--------|-------|-------|---------------|---------|---------|---------|---------|---------|---------|---------|---------|---------|---------------|---------|
| Glycosylation forms                                             | NSTE   | NCTI  | NGTC  | NVSY/<br>NVTY | NGTS    | NNTV    | NTTD    | NDTT    | NRTF    | NGSL    | NGSC    | NCTV    | NTTL    | NVSK/<br>NISK | NCSK    |
| Glycosylated sites                                              | 11-13  | 54-56 | 87-89 | 123-125       | 127-129 | 148-150 | 178-180 | 188-190 | 200-202 | 238-240 | 265-267 | 267-269 | 280-282 | 287-289       | 295-297 |
| Number of glycosylated modification                             | 6182   | 6     | 10    | 6486          | 257     | 20      | 14      | 70      | 1837    | 2       | 3       | 24      | 6140    | 6317          | 5590    |
| The proportion of glycosylation modification(total number:6519) | 94.83% | 0.09% | 0.15% | 99.49%        | 3.94%   | 0.31%   | 0.21%   | 1.07%   | 28.18%  | 0.03%   | 0.05%   | 0.37%   | 94.19%  | 96.90%        | 85.75%  |

Downloaded the HA sequences from 1994 to 2021 of H9N2 avian influenza virus globally or in domestic from GISAID database (<https://www.gisaid.org>). There were 7888 sequences globally and 6519 sequences in domestic, and domestic sequences were included in the global sequences. Summarized the glycosylation modification proportion of different GMS, as illustrated in Table S1 and Table S2.

Table S3 Detailed primers sequences information about specific GMS

|                    | Amino acid position | Primers used | Primers sequences(5'-3')               |                                    |
|--------------------|---------------------|--------------|----------------------------------------|------------------------------------|
| Removal of the GMS | 11-13               | F            | AATCAACAAACTCCGCGGAAACTGTGGACACACT     |                                    |
|                    |                     | R            | AGTGTGTCCACAGTTTCCGCGGAGTTTGTTGATT     |                                    |
|                    | 123-125             | F            | ACACAATCTGGAGTGTGACTTACAGTGGGACAAGC    |                                    |
|                    |                     | R            | GCTTGTCCCCTGTAAGTCACACTCCAGATTGTGT     |                                    |
|                    | 280-282             | F            | GAAAGGTGGCTTAAACACAATATTGCCCTTCCAAAATG |                                    |
|                    |                     | R            | CATTTTGGAAGGGCAATATTGTGTTTAAGCCACCTTC  |                                    |
|                    | 287-289             | F            | AACATTGCCCTTCCAAAAGGTAAGTAAGTATGCATTTG |                                    |
|                    |                     | R            | CAAATGCATACTTACTTACCTTTTGGAAGGGCAATGTT |                                    |
|                    | 295-297             | F            | GCATTTGGAAACTGCCCAAAGTACATTGGTGTA      |                                    |
|                    |                     | R            | TACACCAATGTACTTTGGGCAGTTTCCAAATGC      |                                    |
|                    | Addition of the GMS | 54-56        | F                                      | CTCTTATTCTAGACAACCTGCACCATTGAAGGGC |
|                    |                     |              | R                                      | GCCCTTCAATGGTGCAGTTGTCTAGAATAAGAG  |
| 87-89              |                     | F            | TCAGCTGTTAACGGAACGTGTTATCCCGGGAATGT    |                                    |
|                    |                     | R            | ACATTCCCGGGATAACAGTATCCGTTAACAGCTGA    |                                    |
| 127-129            |                     | F            | TGGAATGTGTCTTACAATGGGACAAGCAAAGC       |                                    |
|                    |                     | R            | GCTTTGCTTGTCCCATTGTAAGACACATTCCA       |                                    |
| 148-150            |                     | F            | TCAAAAGAACAACACCTACCCAACCCAAGATGCT     |                                    |
|                    |                     | R            | AGCATCTTGGGTTGGGTAGGTGTTGTTCTTTTGA     |                                    |
| 178-180            |                     | F            | AAATCACCCACCCACCAATACTACGCAGACAA       |                                    |
|                    |                     | R            | TTGTCTGCGTAGTATTGGTGGGTGGGTGATTT       |                                    |
| 188-190            |                     | F            | AAATCTGTACACCAGAAACGACACAACAACGA       |                                    |
|                    |                     | R            | TCGTTGTTGTGTCGTTTCTGGTGTACAGATTT       |                                    |
| 200-202            |                     | F            | GGAAATGAATAGGACCTTTAAACCATTGATAG       |                                    |
|                    |                     | R            | CTATCAATGGTTTAAAGGTCCTATTCATTTCC       |                                    |
| 238-240            |                     | F            | ACTGCGGATAAAATCTAATGGGAGTCTAATAGCTCCAT |                                    |
|                    |                     | R            | ATGGAGCTATTAGACTCCCACCAGATTTTATCCGCAGT |                                    |

Table S4 Primers of quantitative real-time RT-PCR assay

| Cytokines     | Primers used | Primers sequences(5'-3') |
|---------------|--------------|--------------------------|
| IL-1 $\beta$  | F            | GAAATGCCACCTTTTGACAGTG   |
|               | R            | TGGATGCTCTCATCAGGACAG    |
| IL-6          | F            | CTGCAAGAGACTTCCATCCAG    |
|               | R            | AGTGGTATAGACAGGTCTGTTGG  |
| TNF- $\alpha$ | F            | CCTGTAGCCCACGTCGTAG      |
|               | R            | GGGAGTAGACAAGGTACAACCC   |
| IFN- $\beta$  | F            | TGGGTGGAATGAGACTATTGTTG  |
|               | R            | CTCCACGTCAATCTTTCCTC     |
| GAPDH         | F            | TGACCTCAACTACATGGTCTACA  |
|               | R            | CTTCCCATTCTCGGCCTTG      |

# Figure S1

a 54-56

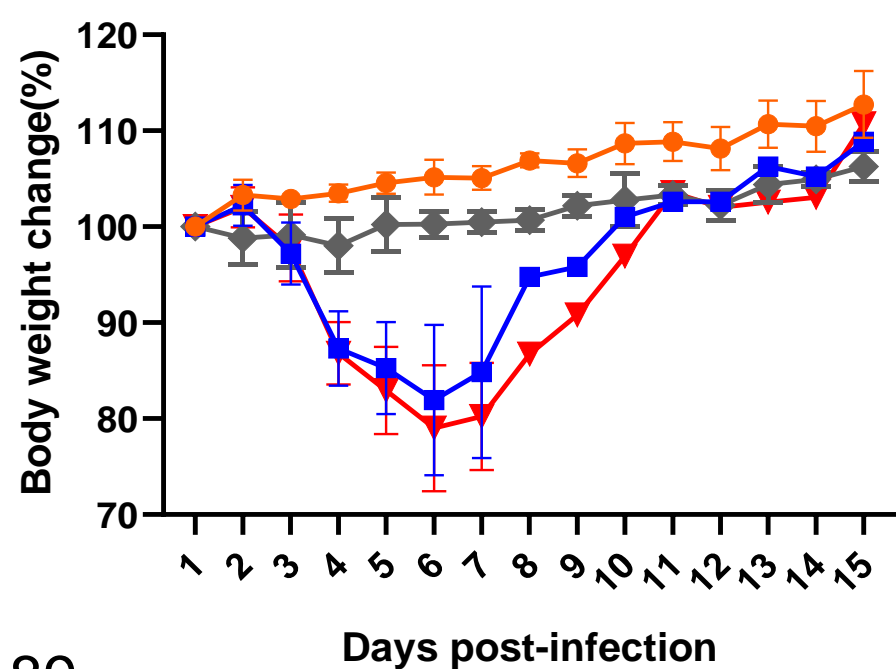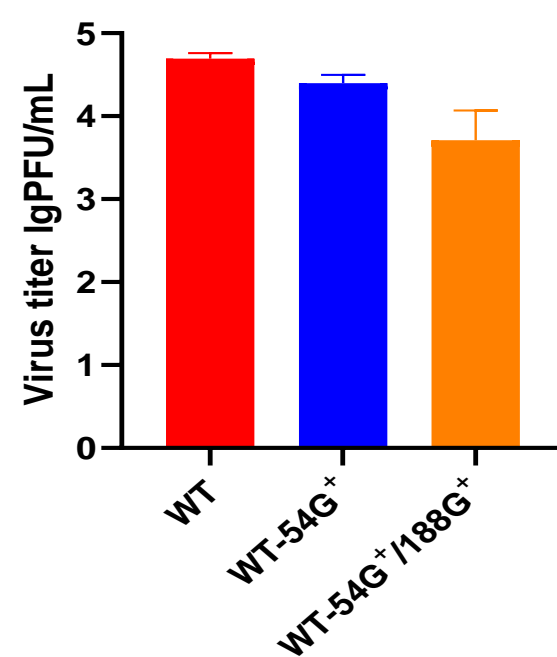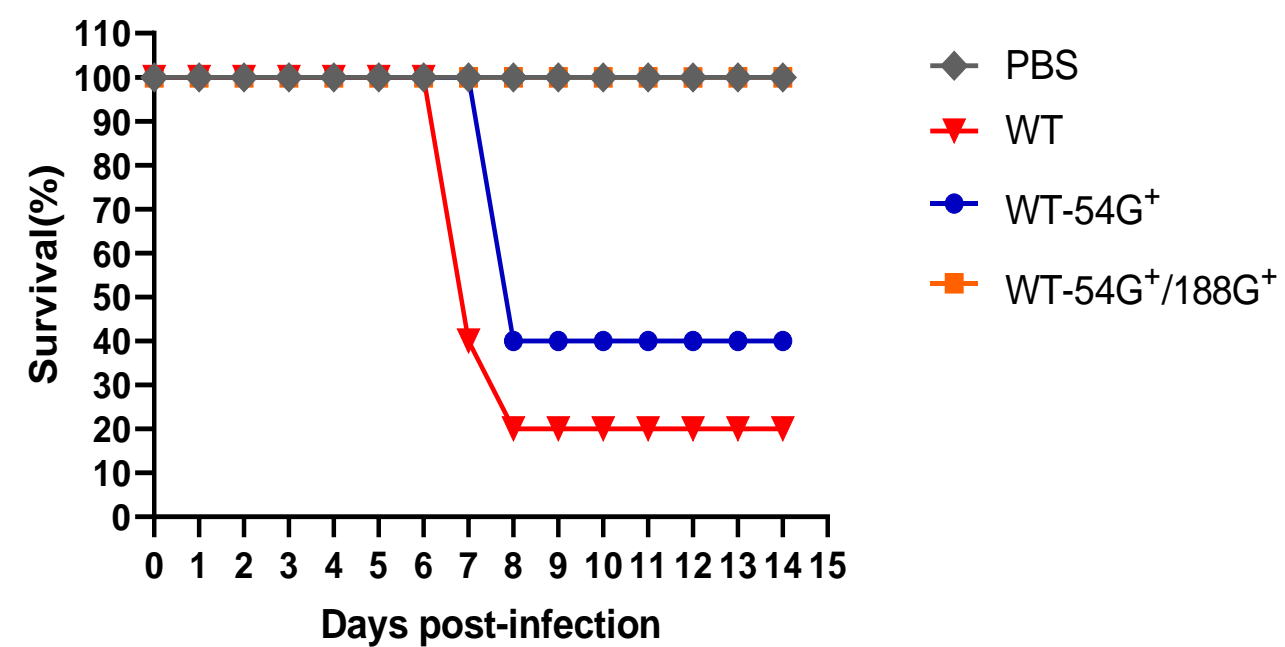

b 87-89

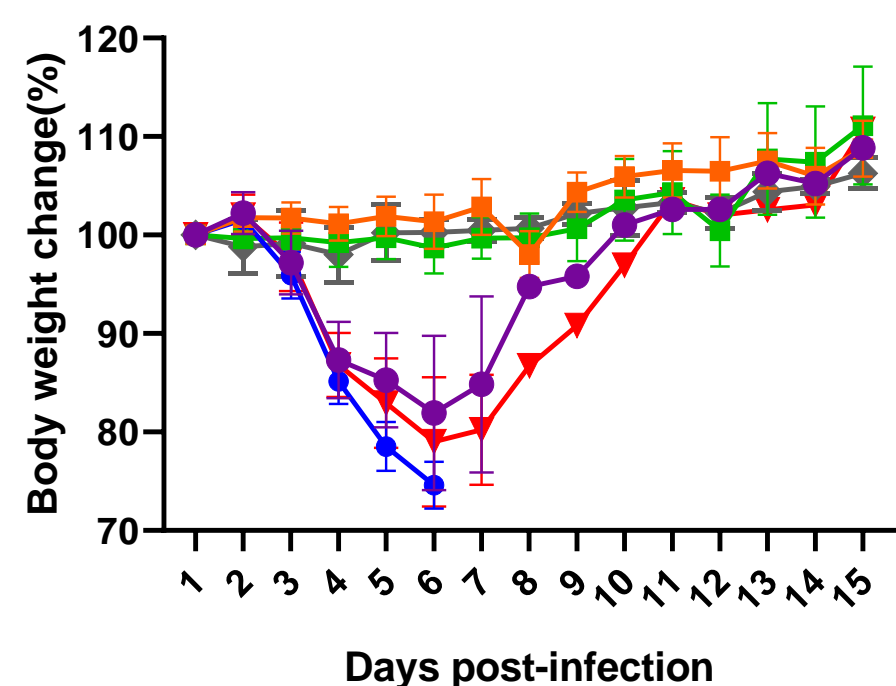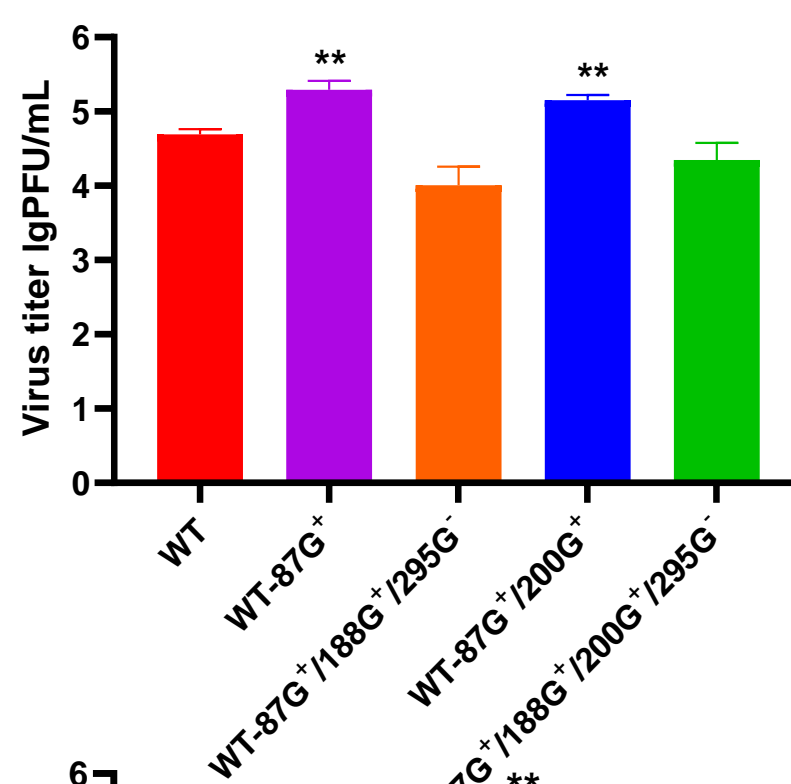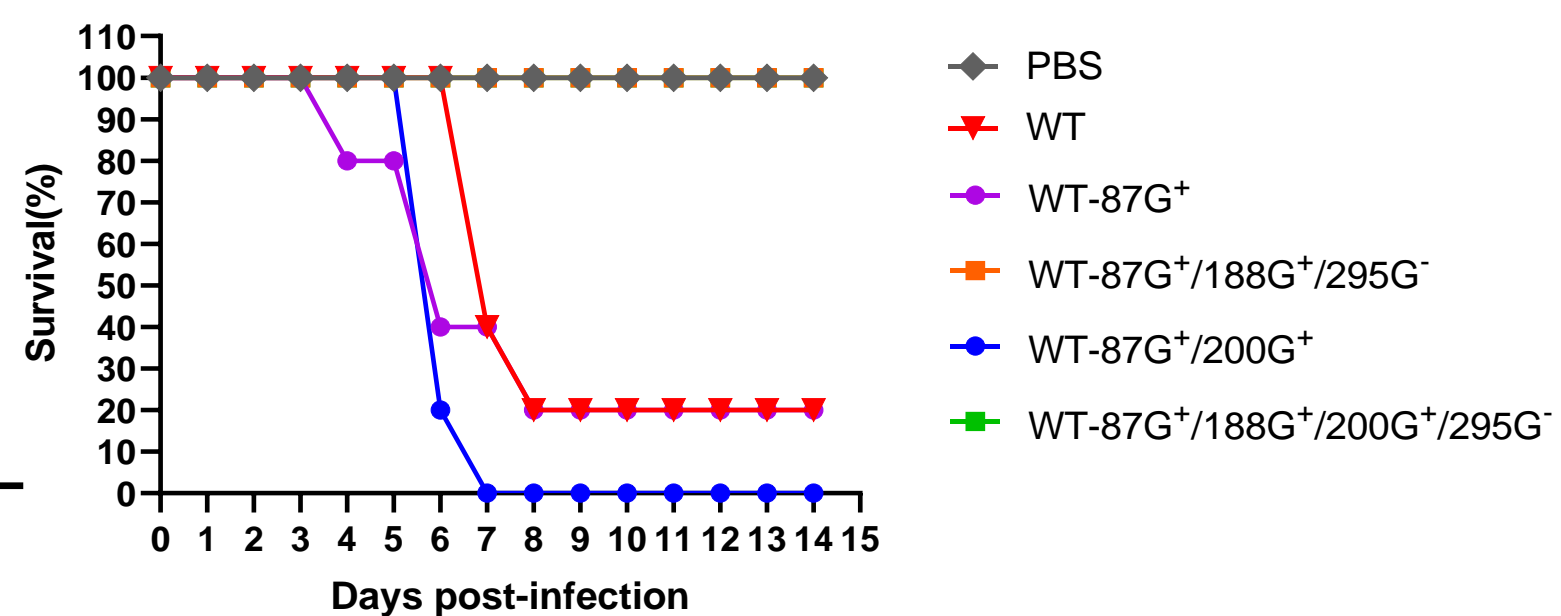

c 127-129

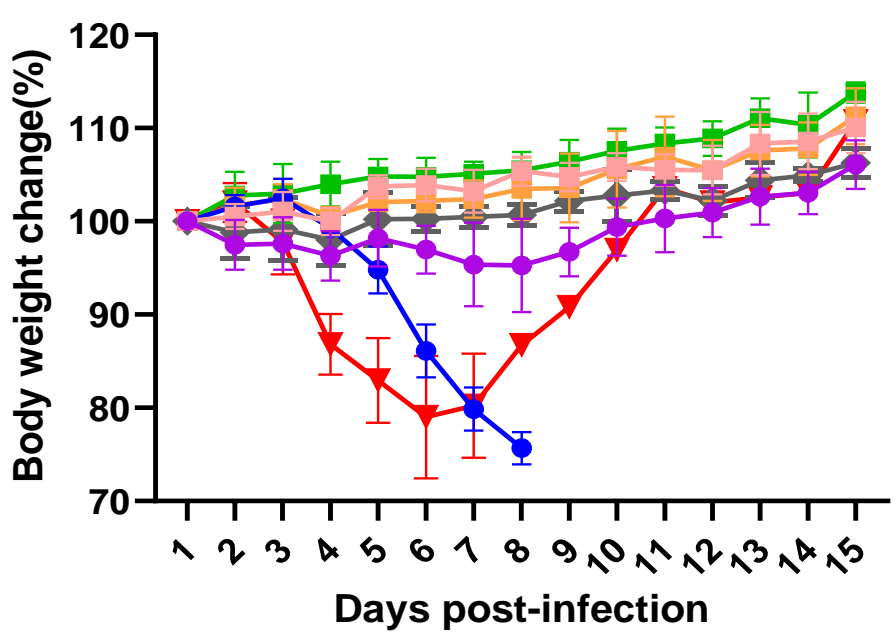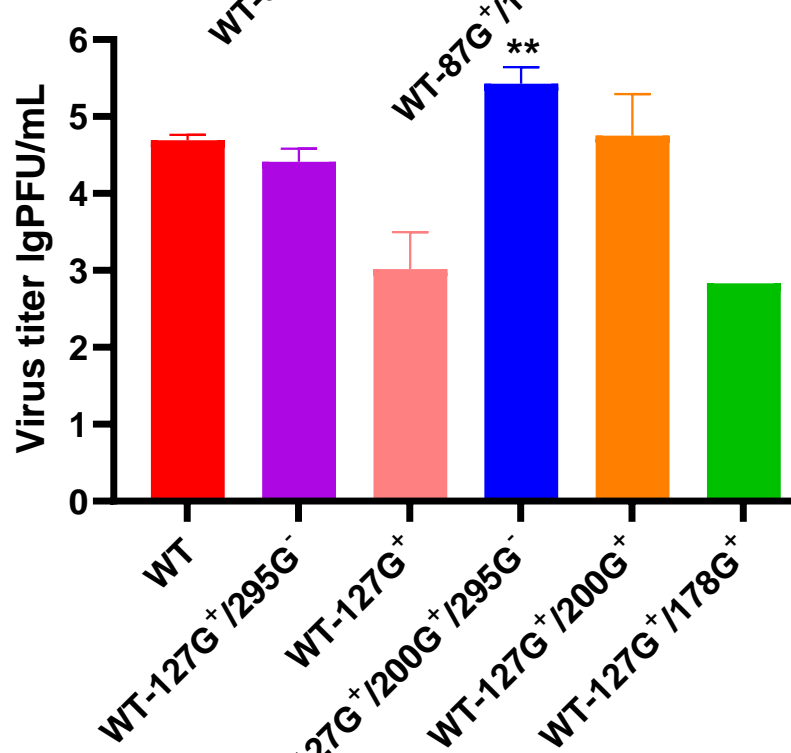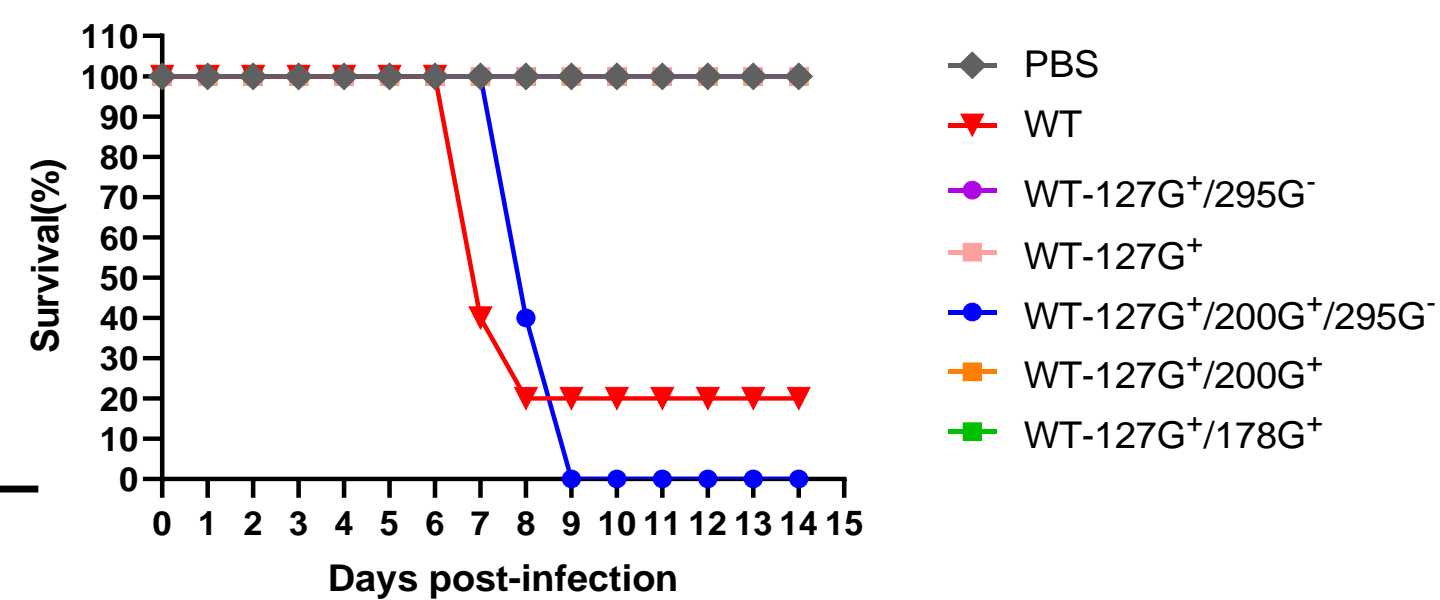

d 148-150

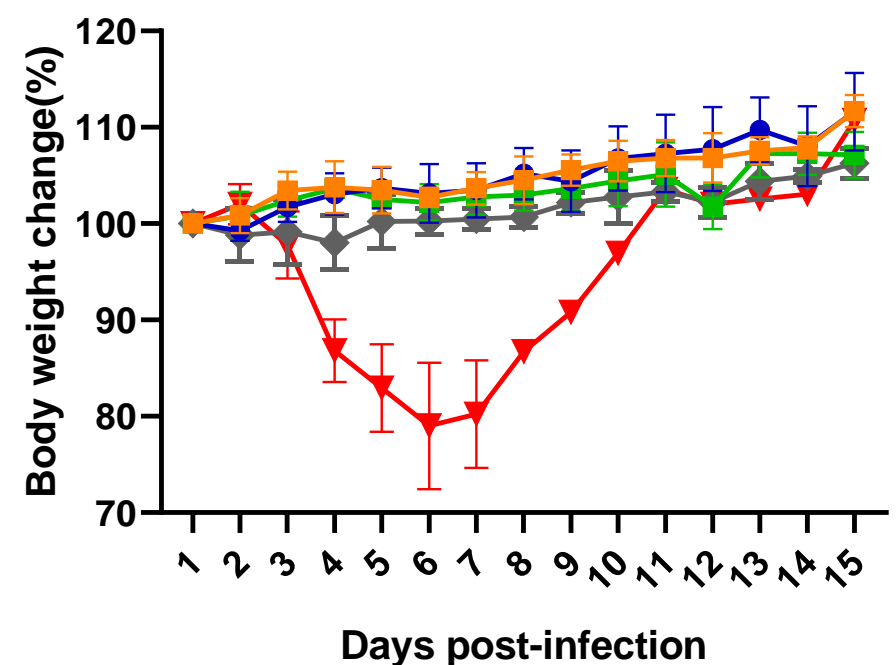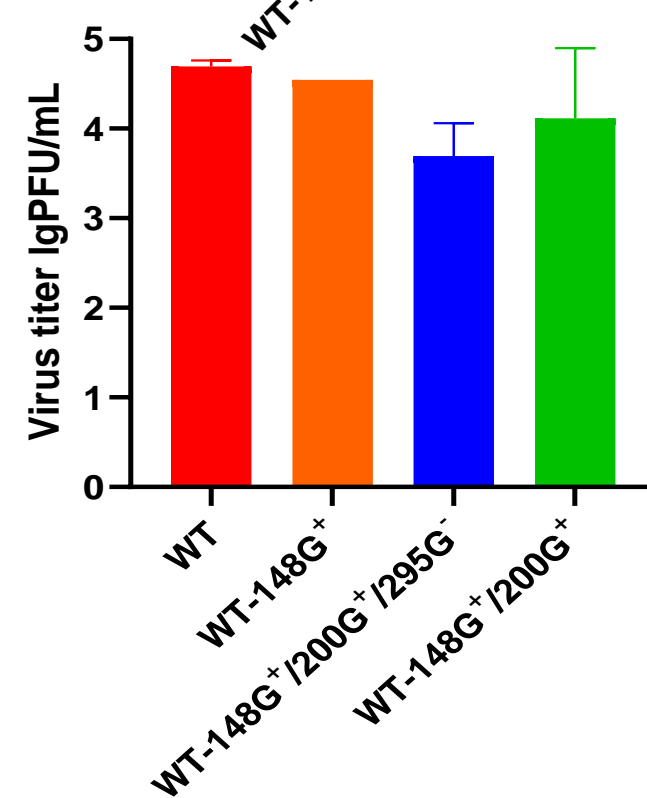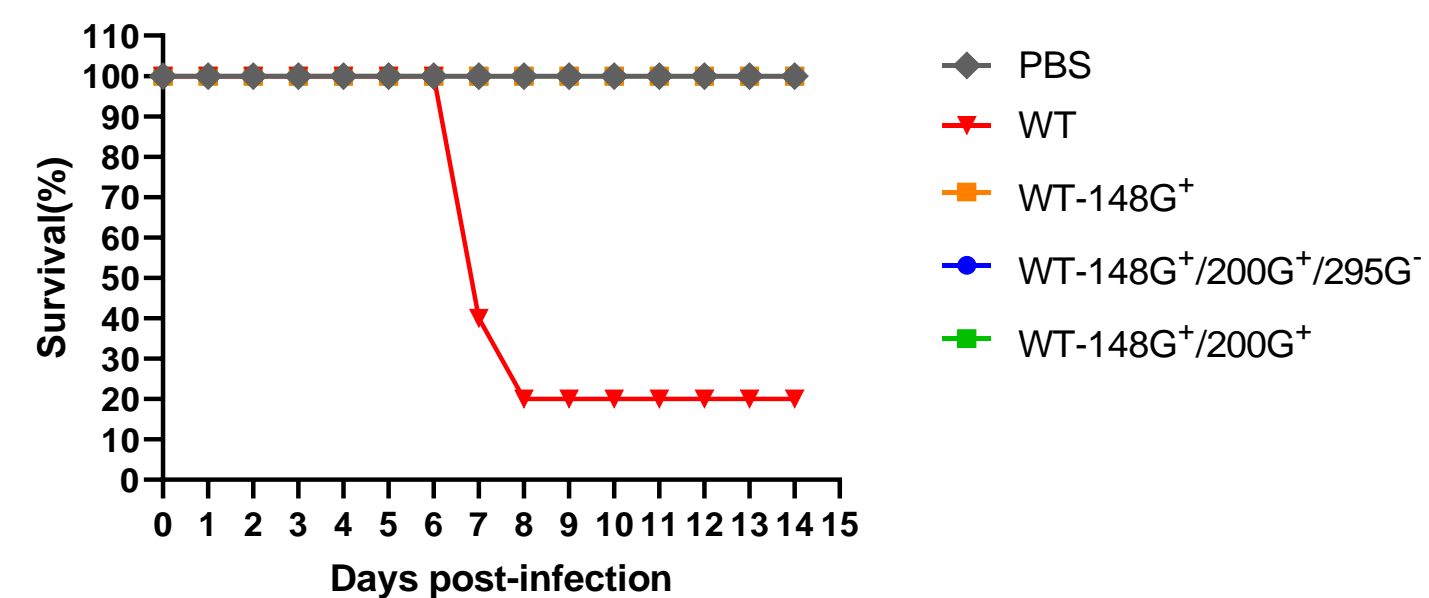

# Figure S1

e 178-180

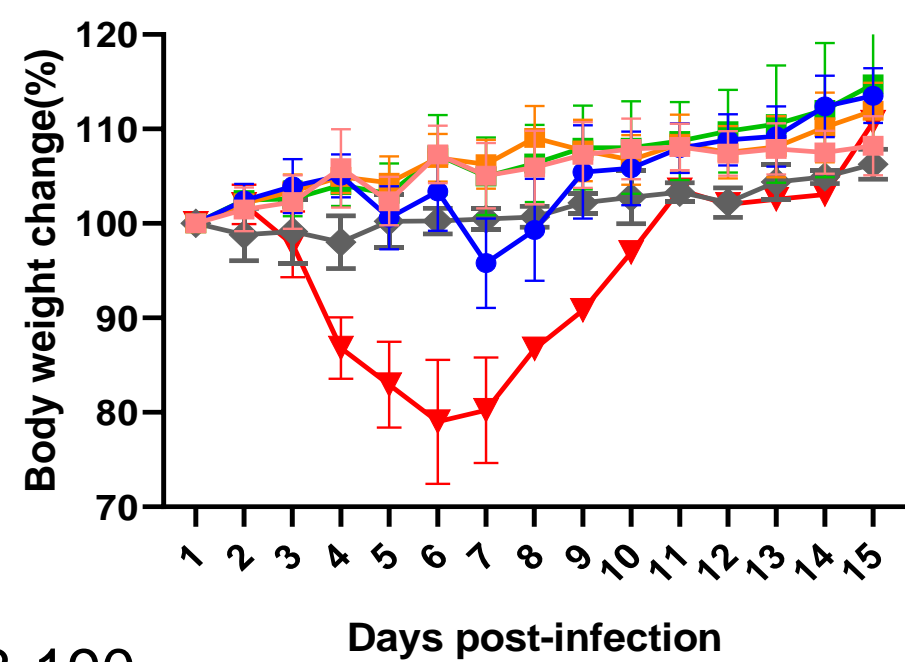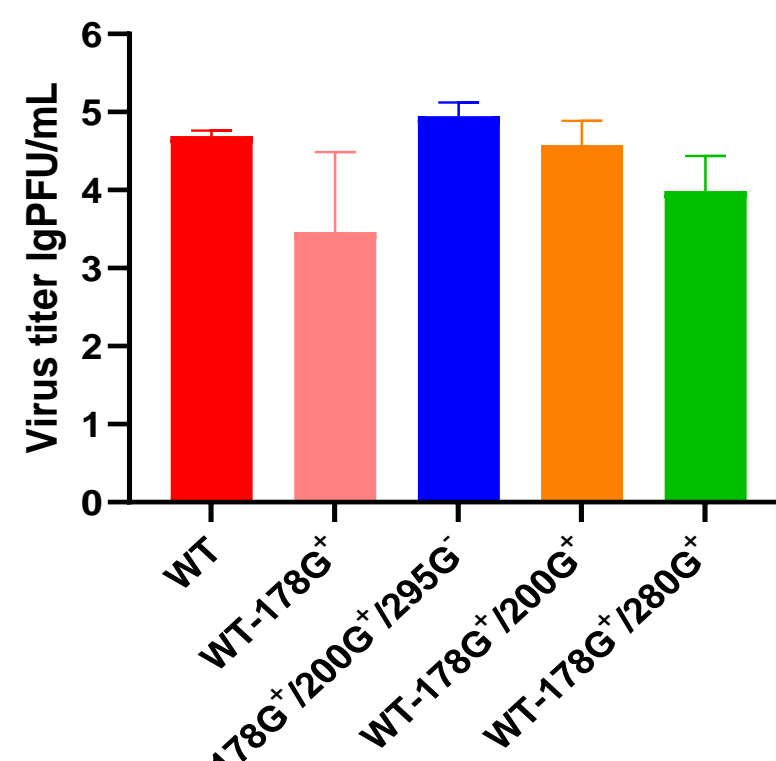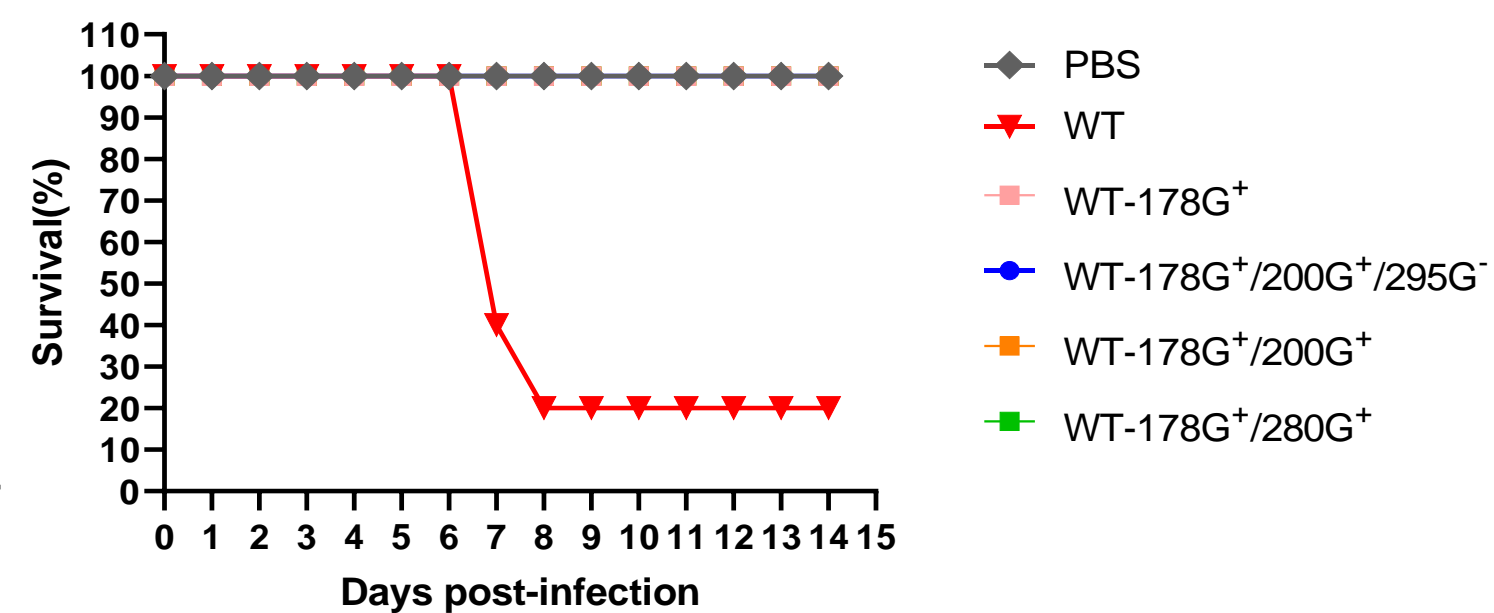

f 188-190

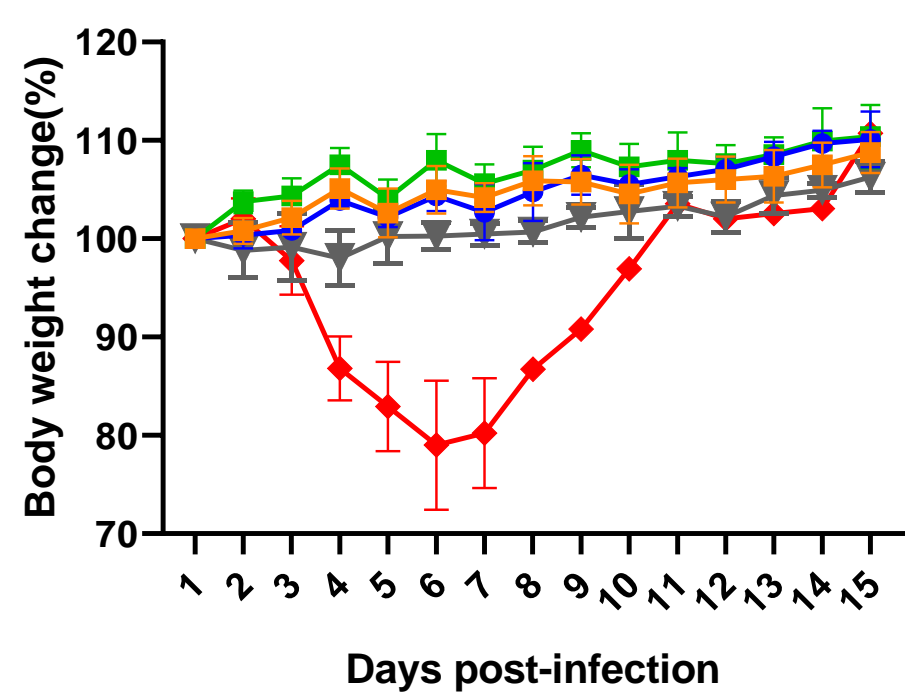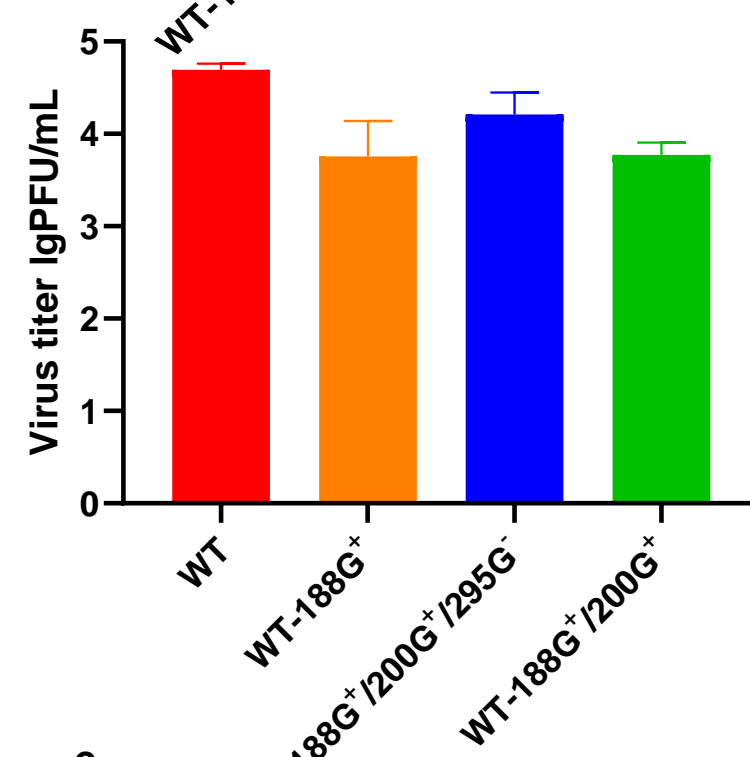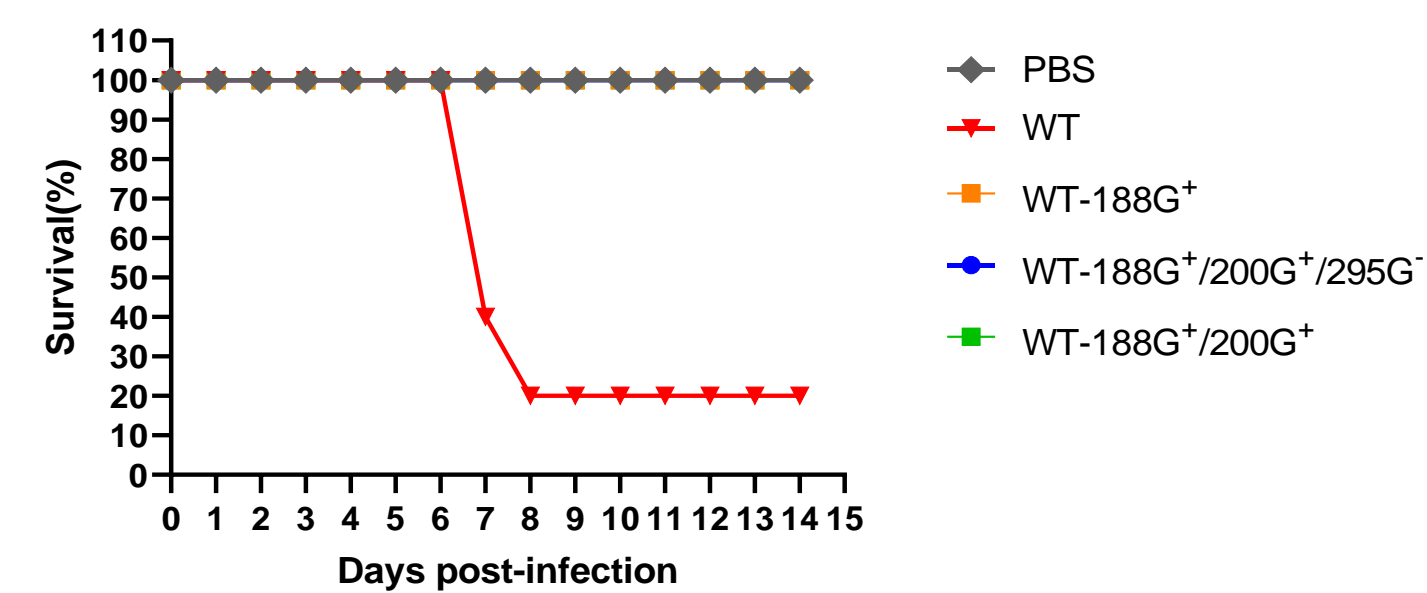

g 200-202 295-297

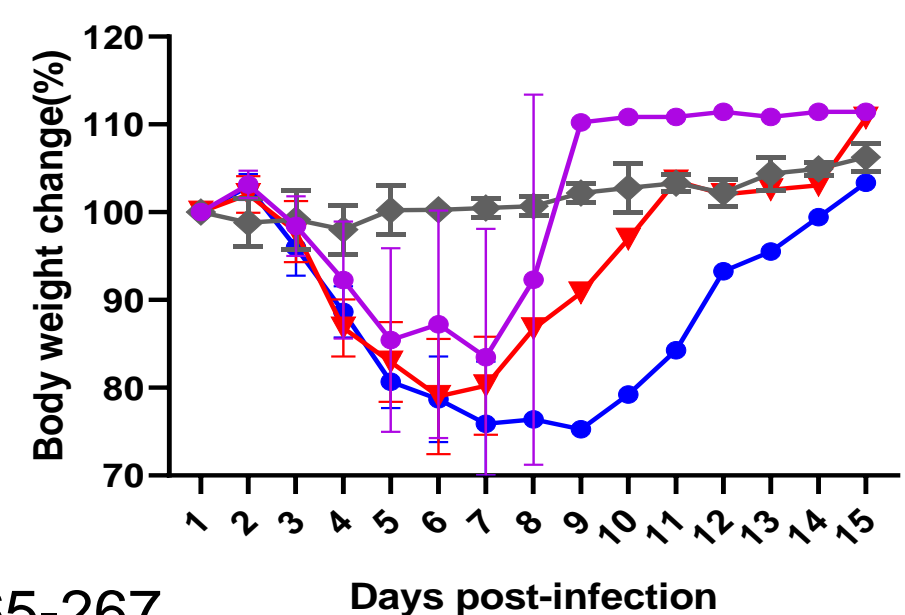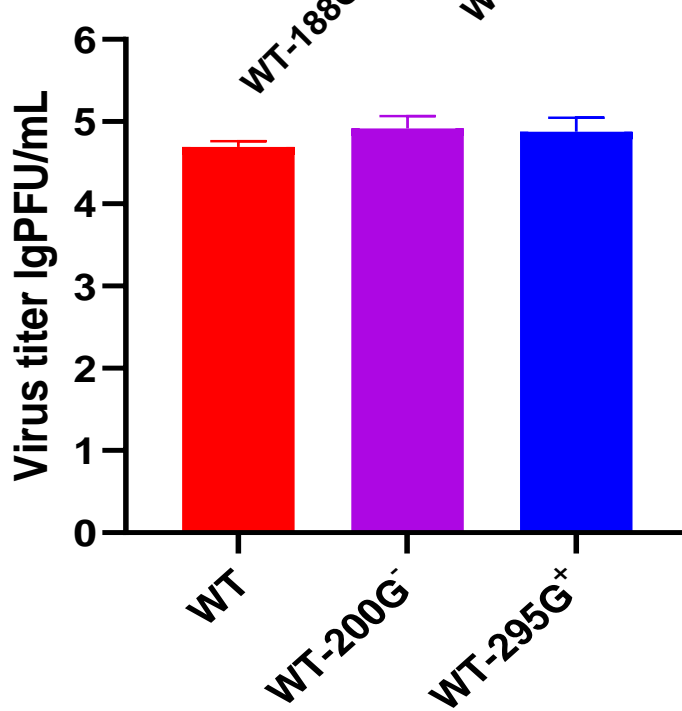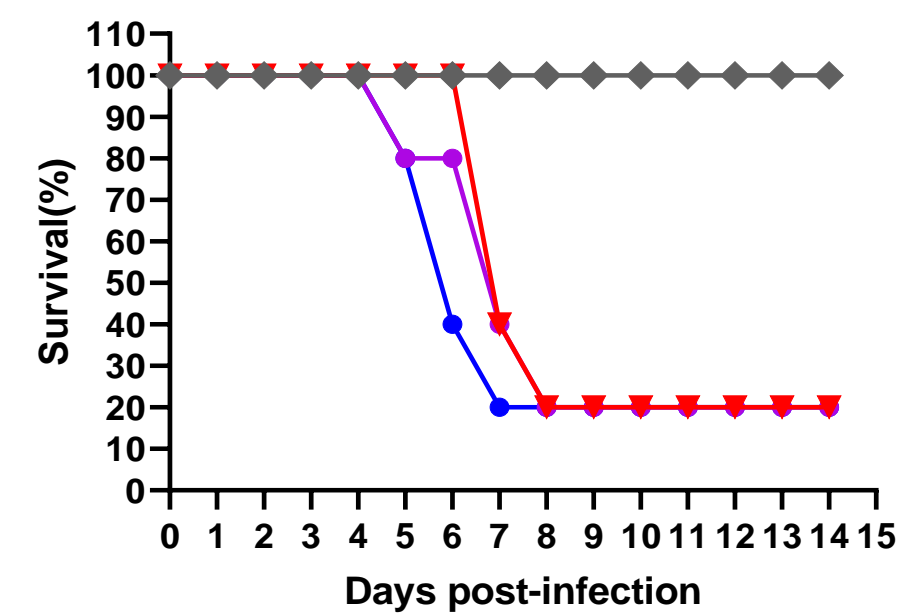

h 265-267

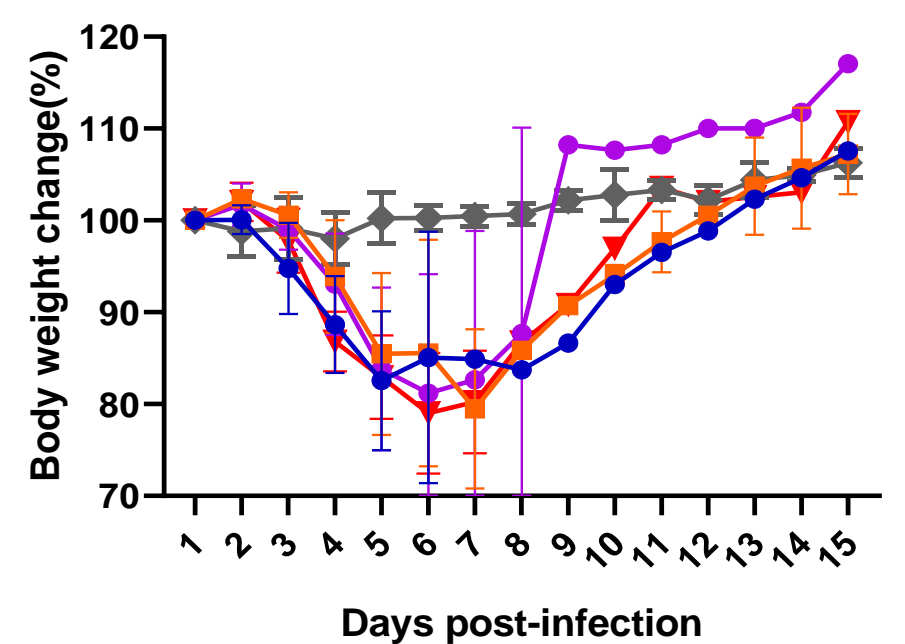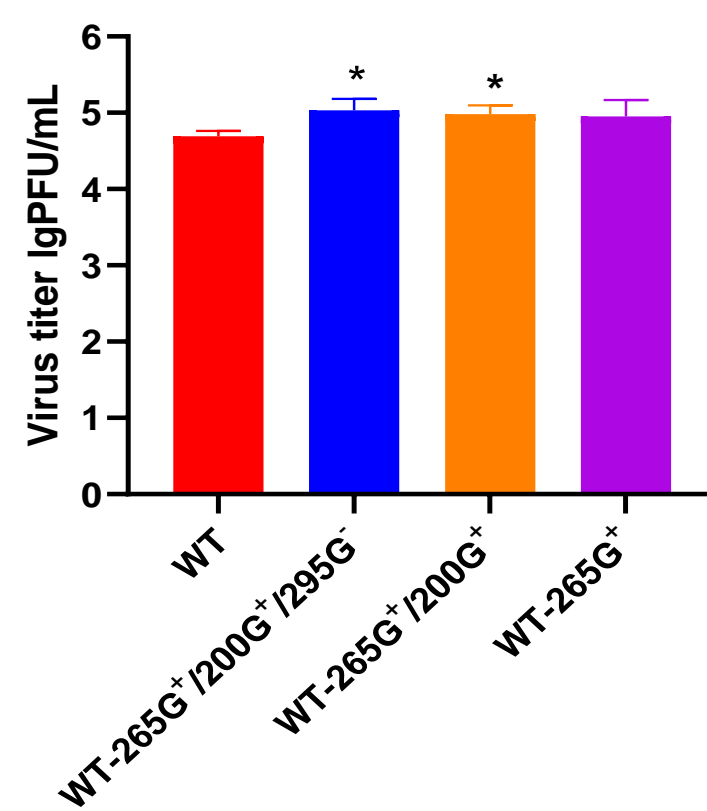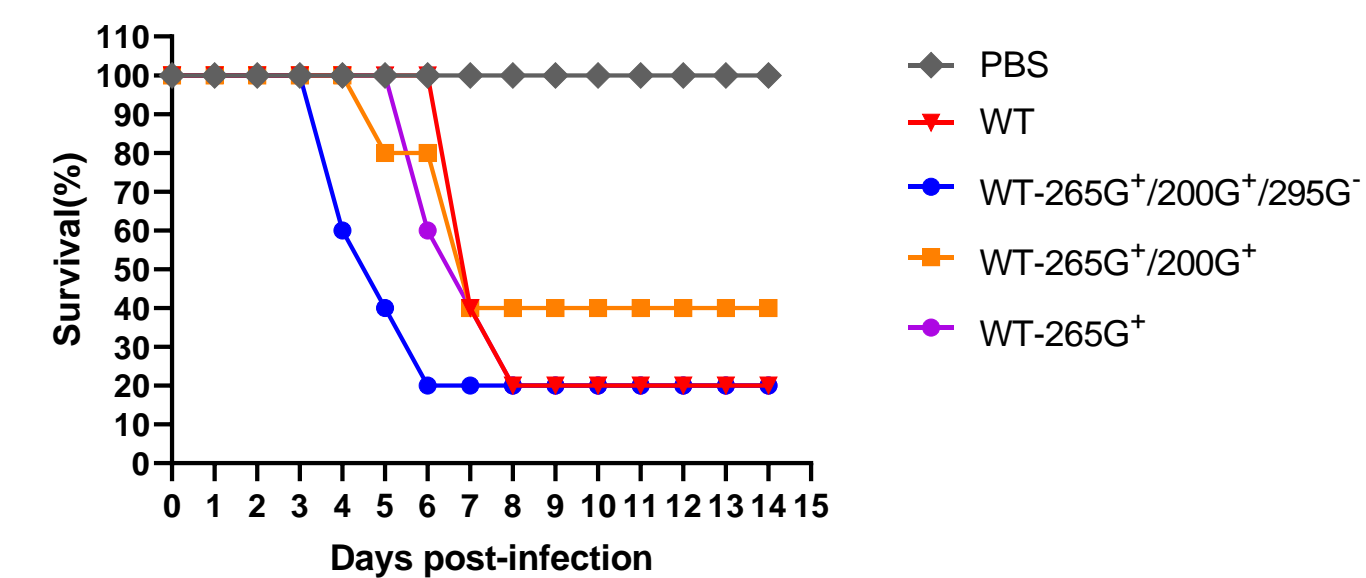

# Figure S1

i 267-269

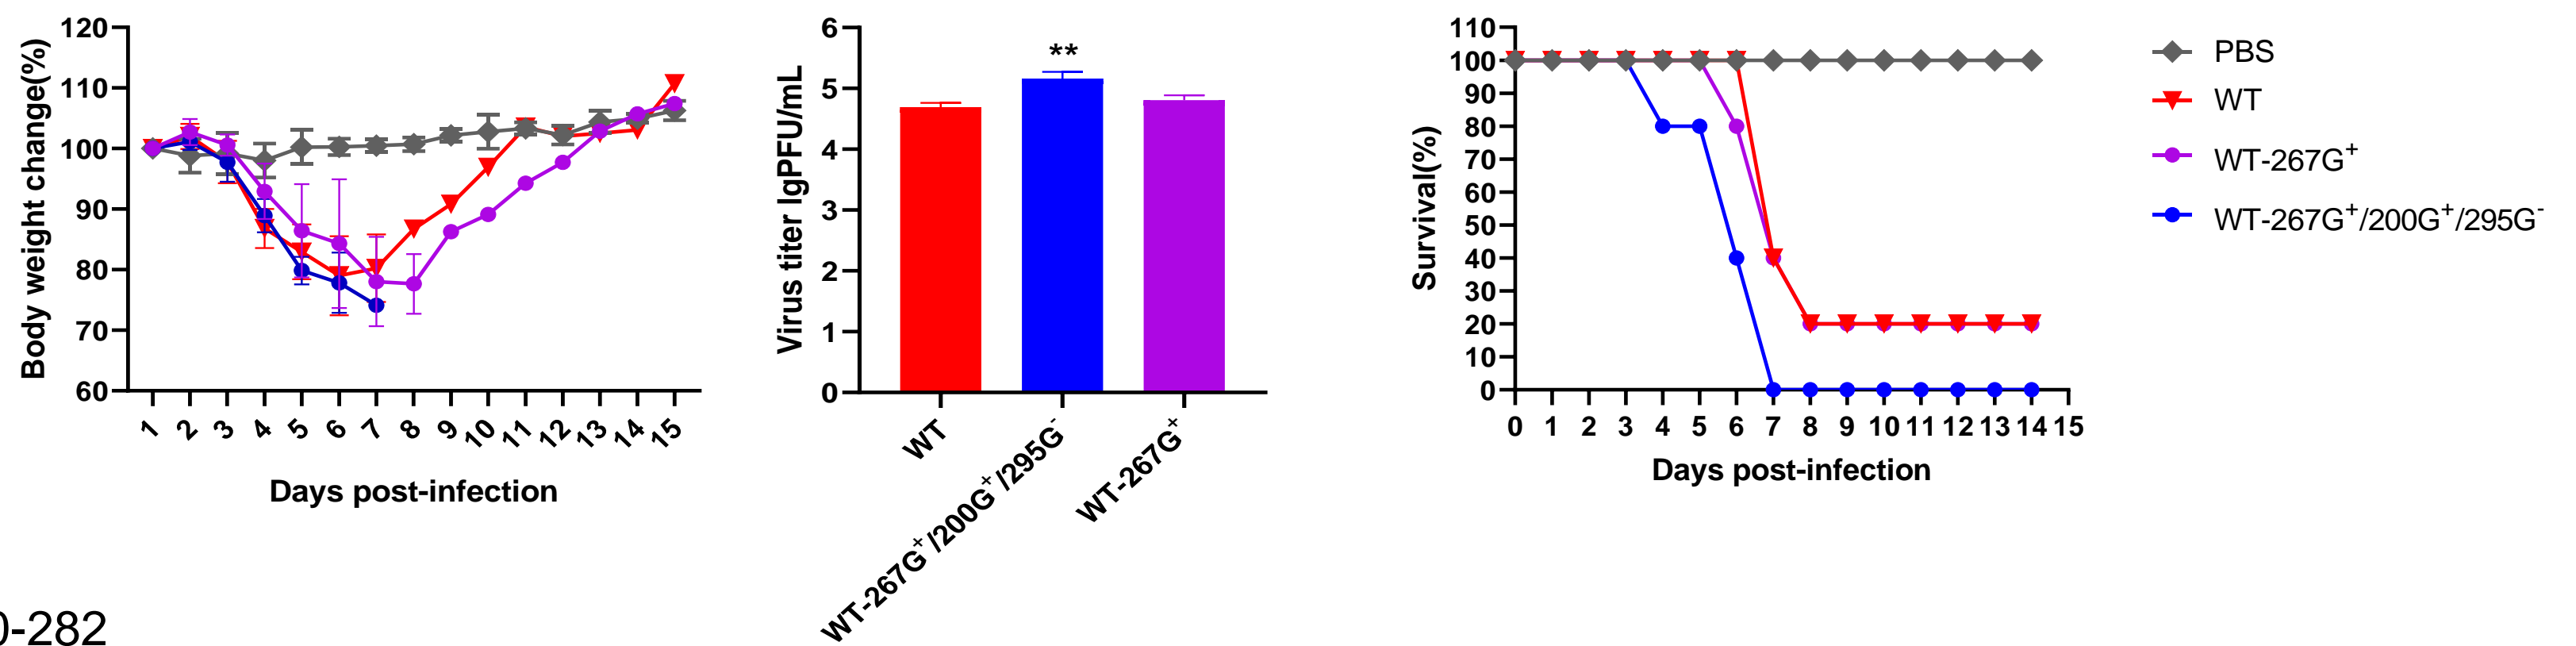

j 280-282

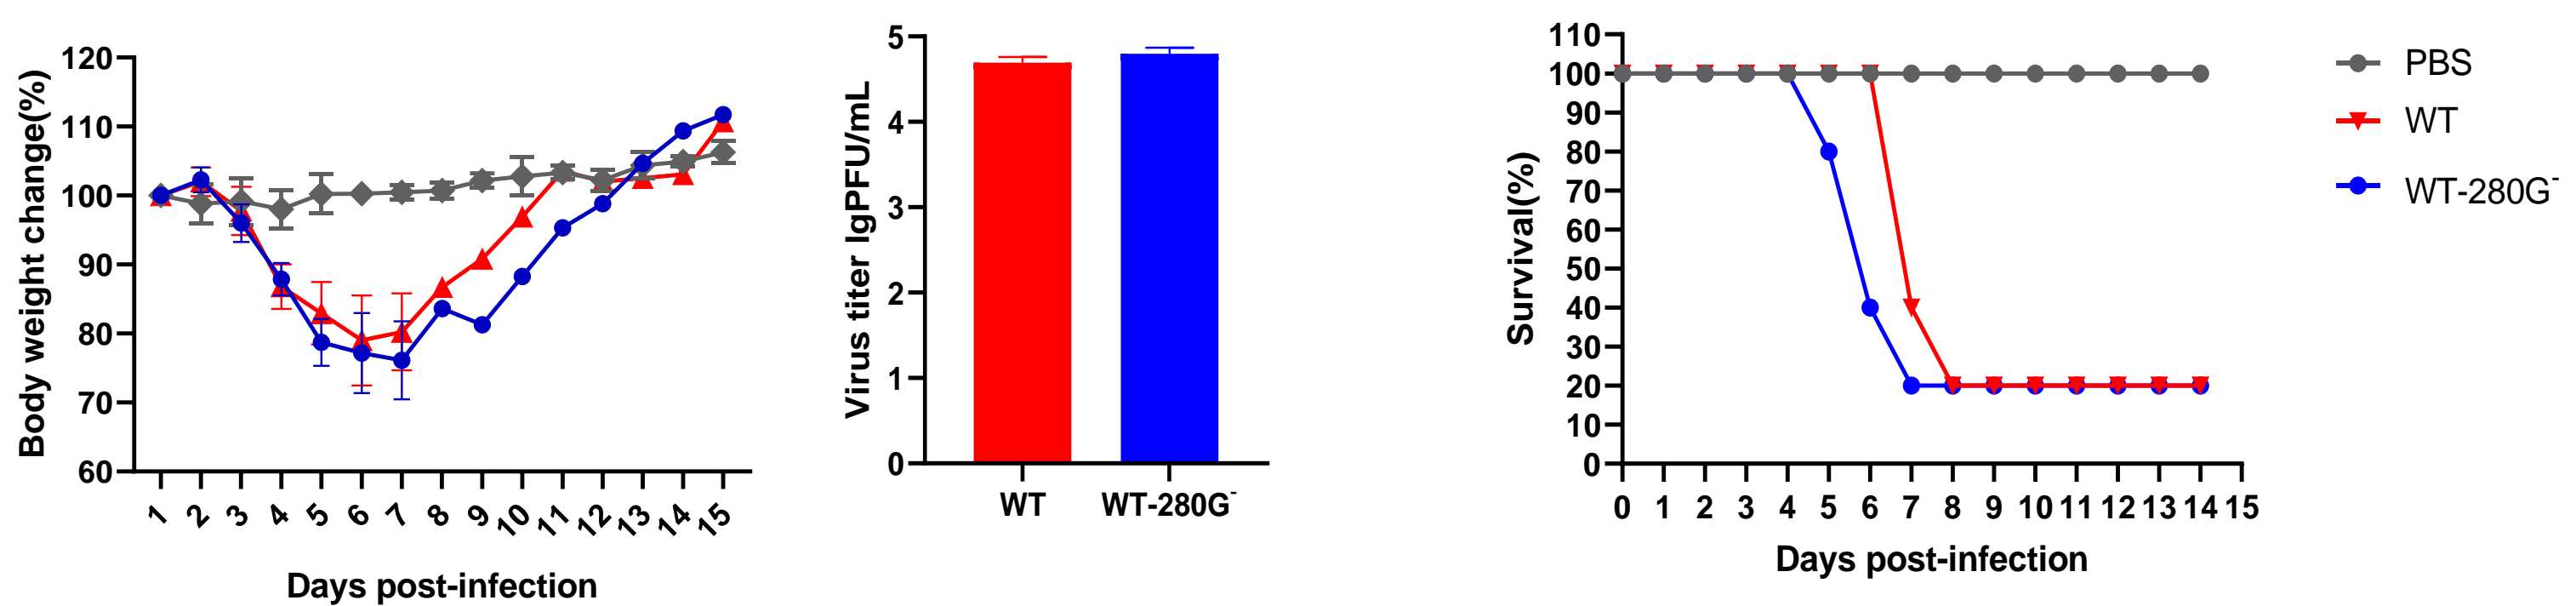

Figure S1: The body weight change, viral titers of lungs and fatality rate of every group of GMS viruses. Six-week-old SPF Balb/c mice were inoculated intranasally with  $4 \times 10^5$  PFU all GMS viruses, continuously monitored changes in mouse body weight until 14 days after challenge and lungs were collected on day 3 post-infection for virus titration in MDCK cells. Different letters from a to j represented different GMS groups, every group contained single site GMS virus and its related combination viruses. Summarized the weight changes, lung viral titers and fatality rate of each group GMS virus for comprehensive analysis. a: 54-56; b: 87-89; c: 127-129; d: 148-150; e: 178-180; f: 188-190; g: 200-202 and 295-297; h: 265-267; i: 267-269; j: 280-282; WT and PBS in every group were colored with red and grey. In every group, different GMS viruses were represented with various colors according to the pathogenicity to mice. Among them, dark blue represented the strongest pathogenicity in this group, followed by purple, next orange and green, and finally light pink, indicating the weakest pathogenicity to mice in this group.
